# Supplementary material for: Titanium dioxide functionalized silicon carbide phases as heterogeneous epoxidation catalysts
Source: Royal Society of Chemistry journal article supplement (doi:10.1039/d4na00575a), 2024-01-01
Supplement: d4na00575a1.pdf [file d4na00575a1.pdf]

*Electronic Supplementary Information*

Titanium dioxide functionalized silicon carbide  
phases as heterogeneous epoxidation catalysts

*Léa Gonçalves, Olinda Gimello, Karim Bouchmella, Peter Hesemann, and Johan G.*

*Alauzun\**

ICGM, Univ Montpellier, CNRS, ENSCM, Montpellier, France.

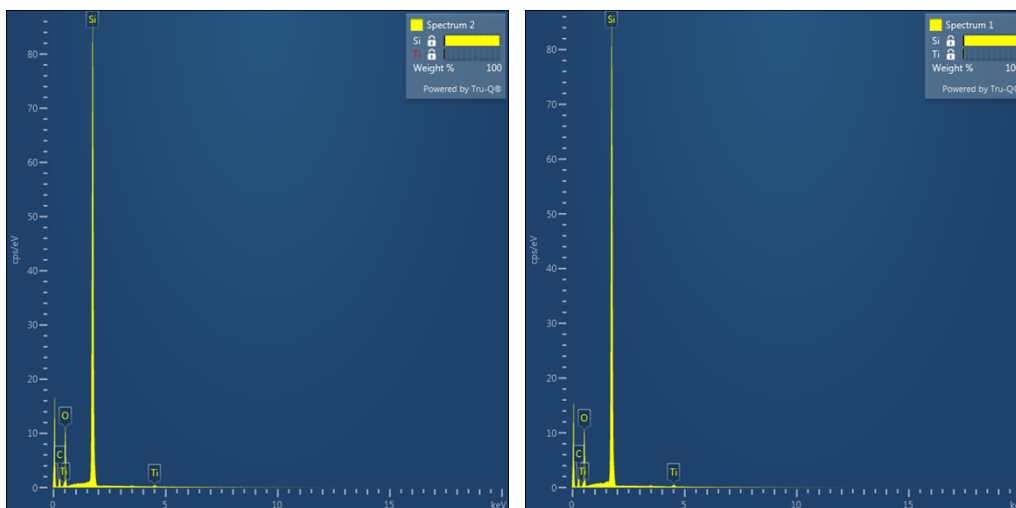

**Figure S1** EDX spectra of the material  $\text{TiO}_2@\text{SiC}/\text{SiO}_2\text{-p}$

**Table S1** Ti and Si contents of material  $\text{TiO}_2@\text{SiC}/\text{SiO}_2\text{-p}$  measured by EDX

| Spectrum Label     | Spectrum 1 | Spectrum 2 |
|--------------------|------------|------------|
| Si                 | 98.83      | 99.02      |
| Ti                 | 1.17       | 0.98       |
| Total              | 100.00     | 100.00     |
| Statistics         | Si         | Ti         |
| Max                | 99.02      | 1.17       |
| Min                | 98.83      | 0.98       |
| Average            | 98.93      | 1.07       |
| Standard Deviation | 0.13       | 0.13       |

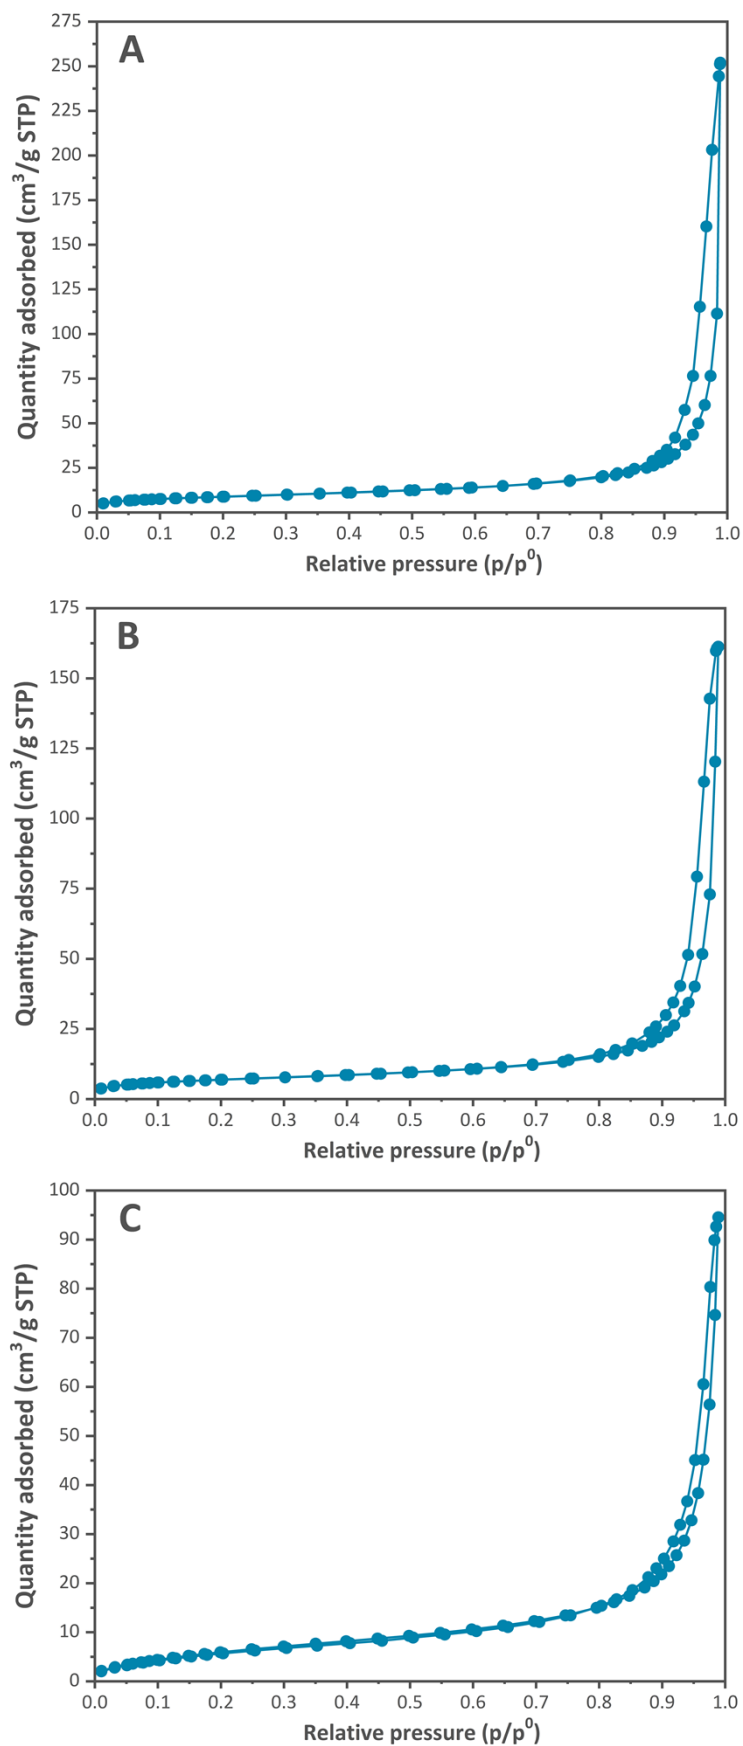

**Figure S2:** Nitrogen sorption isotherms of the materials (A) SiC, (B) SiC/SiO<sub>2</sub> and (C) TiO<sub>2</sub>@SiC/SiO<sub>2</sub>-p

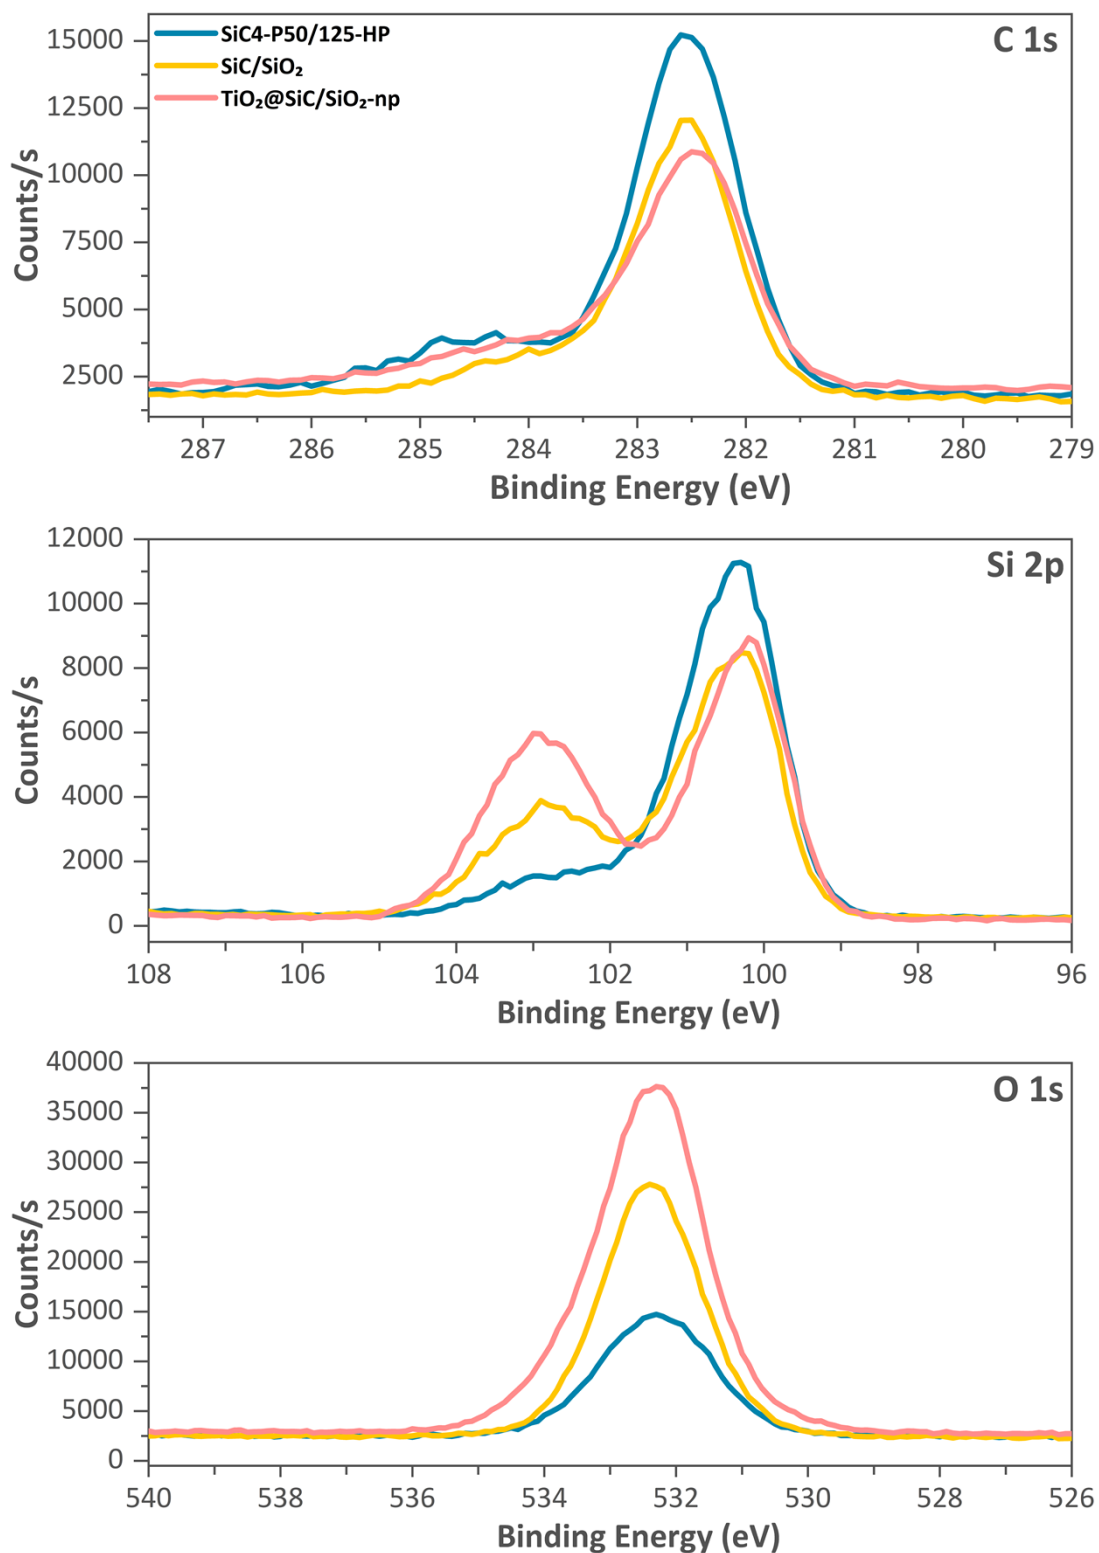

**Figure S3** XPS spectra of the commercial SiC material (SiC4-P50/125-HP) before (blue) and after oxidation (SiC/SiO<sub>2</sub>, yellow) at 1000°C under air during 2h and after titanium-grafting “TiO<sub>2</sub>@SiC/SiO<sub>2</sub>-np” (pink)

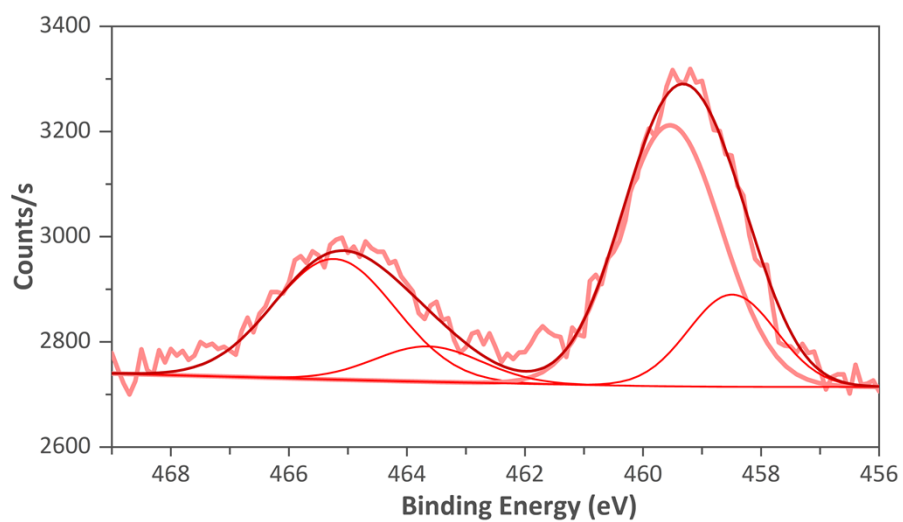

**Figure S4** XPS Ti 2p spectra of “TiO<sub>2</sub>@SiC/SiO<sub>2</sub>-np”

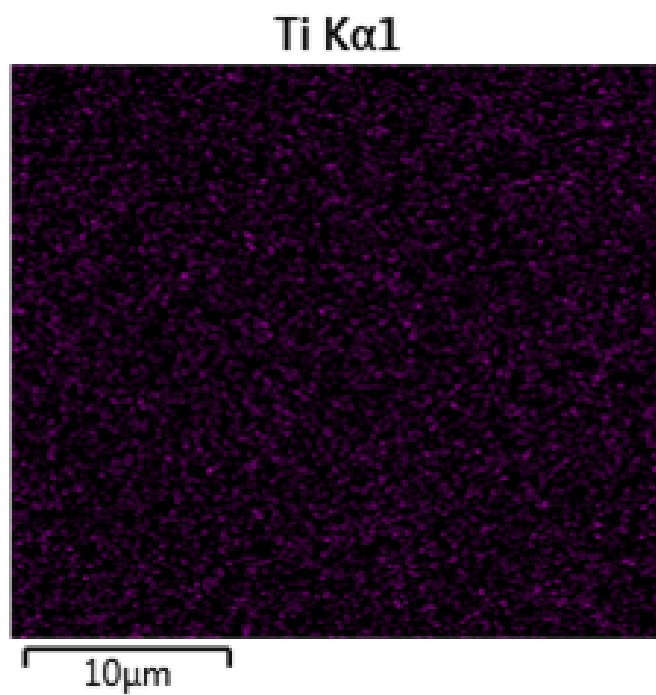

**Figure S5** EDX mapping of the TiO<sub>2</sub>@SiC/SiO<sub>2</sub>-p material
